# Supplementary material for: Socioeconomic Vulnerability to Depressive Symptoms in Patients with Chronic Hepatitis B
Source: MDPI journal article supplement (doi:10.3390/ijerph16020255), 2019-01-17
Supplement: s1 [file s1]

**Supplementary Material 1.** Survey of mental health status of patients having chronic liver B disease at Viet Tiep Hai Phong Friendship Hospital.

|            |                                                                                                                                                                                     |                         |                                 |                              |                                 |                             |
|------------|-------------------------------------------------------------------------------------------------------------------------------------------------------------------------------------|-------------------------|---------------------------------|------------------------------|---------------------------------|-----------------------------|
| <b>A</b>   | <b>General information</b>                                                                                                                                                          |                         |                                 |                              |                                 |                             |
| <b>A1.</b> | <b>Year of birth?</b>                                                                                                                                                               |                         |                                 |                              |                                 | .....                       |
| <b>A2.</b> | <b>Gender?</b>                                                                                                                                                                      |                         |                                 |                              |                                 |                             |
|            | Male                                                                                                                                                                                |                         |                                 |                              |                                 | 1                           |
|            | Female                                                                                                                                                                              |                         |                                 |                              |                                 | 2                           |
| <b>A3.</b> | <b>Highest educational level?</b>                                                                                                                                                   |                         |                                 |                              |                                 |                             |
|            | Illiteracy                                                                                                                                                                          |                         |                                 |                              |                                 | 1                           |
|            | Primary school                                                                                                                                                                      |                         |                                 |                              |                                 | 2                           |
|            | Secondary school                                                                                                                                                                    |                         |                                 |                              |                                 | 3                           |
|            | High school                                                                                                                                                                         |                         |                                 |                              |                                 | 4                           |
|            | College, vocational training                                                                                                                                                        |                         |                                 |                              |                                 | 5                           |
|            | University                                                                                                                                                                          |                         |                                 |                              |                                 | 6                           |
|            | Post-graduated                                                                                                                                                                      |                         |                                 |                              |                                 | 7                           |
| <b>A4.</b> | <b>Marital status?</b>                                                                                                                                                              |                         |                                 |                              |                                 |                             |
|            | Single                                                                                                                                                                              |                         |                                 |                              |                                 | 1                           |
|            | Living with your spouse/partner                                                                                                                                                     |                         |                                 |                              |                                 | 2                           |
|            | Living together as a spouse, unmarried                                                                                                                                              |                         |                                 |                              |                                 | 3                           |
|            | Divorce / Separation                                                                                                                                                                |                         |                                 |                              |                                 | 4                           |
|            | Widow                                                                                                                                                                               |                         |                                 |                              |                                 | 5                           |
| <b>A5.</b> | <b>Current occupation? (with income)</b>                                                                                                                                            |                         |                                 |                              |                                 |                             |
|            | Unemployment                                                                                                                                                                        |                         |                                 |                              |                                 | 1                           |
|            | Freelance                                                                                                                                                                           |                         |                                 |                              |                                 | 2                           |
|            | White-collar worker                                                                                                                                                                 |                         |                                 |                              |                                 | 3                           |
|            | Blue-collar worker, Farmers                                                                                                                                                         |                         |                                 |                              |                                 | 4                           |
|            | Student                                                                                                                                                                             |                         |                                 |                              |                                 | 5                           |
|            | Other occupations (with income)                                                                                                                                                     |                         |                                 |                              |                                 | 6                           |
| <b>A6.</b> | <b>Within the last year, what is the average monthly income of your family?</b>                                                                                                     |                         |                                 |                              |                                 | ..... VND                   |
| <b>B</b>   | <b>Health status</b>                                                                                                                                                                |                         |                                 |                              |                                 |                             |
| <b>B1</b>  | Next, I would like to ask you 5 questions about the health status today. Please answer based on the scale of 1 to 5. In which 1 is "being unable/extremely" and 5 is "No problems". |                         |                                 |                              |                                 |                             |
|            | <i>Today.....</i>                                                                                                                                                                   | <b>Being<br/>unable</b> | <b>Severe<br/>problem<br/>s</b> | <b>Moderate<br/>problems</b> | <b>Slight<br/>problem<br/>s</b> | <b>No<br/>problem<br/>s</b> |
|            | 1. Do you have problems in walking about?                                                                                                                                           | 1                       | 2                               | 3                            | 4                               | 5                           |
|            | 2. Do you have problems in washing or dressing yourself?                                                                                                                            | 1                       | 2                               | 3                            | 4                               | 5                           |
|            | 3. Do you have problems in doing your usual activities ?                                                                                                                            | 1                       | 2                               | 3                            | 4                               | 5                           |
|            |                                                                                                                                                                                     |                         |                                 |                              |                                 |                             |
|            |                                                                                                                                                                                     | <b>Extreme</b>          | <b>Severe</b>                   | <b>Moderate</b>              | <b>Slight</b>                   | <b>No<br/>problem<br/>m</b> |
|            | 4. Do you have pain or discomfort?                                                                                                                                                  | 1                       | 2                               | 3                            | 4                               | 5                           |
|            | 5. Do you have anxiety or depression                                                                                                                                                | 1                       | 2                               | 3                            | 4                               | 5                           |

|                                                                                |                                                                                                                               |                                                                                                                                                                             |                          |                                                   |                            |   |
|--------------------------------------------------------------------------------|-------------------------------------------------------------------------------------------------------------------------------|-----------------------------------------------------------------------------------------------------------------------------------------------------------------------------|--------------------------|---------------------------------------------------|----------------------------|---|
| <b>B4</b>                                                                      | <b>Do you have any health problems (diseases or symptoms)?</b>                                                                |                                                                                                                                                                             |                          |                                                   |                            |   |
|                                                                                | 1.                                                                                                                            | 4.                                                                                                                                                                          | 7.                       |                                                   |                            |   |
|                                                                                | 2.                                                                                                                            | 5.                                                                                                                                                                          | 8.                       |                                                   |                            |   |
|                                                                                | 3.                                                                                                                            | 6.                                                                                                                                                                          | 9.                       |                                                   |                            |   |
| <b>B5</b>                                                                      | Next, please answer 9 questions about some issues in the past 2 weeks. Please circle the appropriate answer in each sentence! |                                                                                                                                                                             |                          |                                                   |                            |   |
|                                                                                | <b>Over the last two weeks, how often have you been bothered by any of the following problems?</b>                            | <i>Circle the corresponding option</i>                                                                                                                                      |                          |                                                   |                            |   |
|                                                                                |                                                                                                                               | <b>Not at all</b>                                                                                                                                                           | <b>Severa<br/>l days</b> | <b>More<br/>than<br/>half of<br/>the<br/>days</b> | <b>Nearly<br/>everyday</b> |   |
|                                                                                |                                                                                                                               | Little interest or pleasure in doing thing                                                                                                                                  | 0                        | 1                                                 | 2                          | 3 |
|                                                                                |                                                                                                                               | Feeling down, depressed, or hopeless                                                                                                                                        | 0                        | 1                                                 | 2                          | 3 |
|                                                                                |                                                                                                                               | Trouble falling or staying asleep, or sleeping too much                                                                                                                     | 0                        | 1                                                 | 2                          | 3 |
|                                                                                |                                                                                                                               | Feeling tired or having little energy                                                                                                                                       | 0                        | 1                                                 | 2                          | 3 |
|                                                                                |                                                                                                                               | Poor appetite or overeating                                                                                                                                                 | 0                        | 1                                                 | 2                          | 3 |
|                                                                                |                                                                                                                               | Feeling bad about yourself - or that you are a failure or have let yourself or your family down                                                                             | 0                        | 1                                                 | 2                          | 3 |
|                                                                                |                                                                                                                               | Trouble concentrating on things, such as reading the newspaper or watching television                                                                                       | 0                        | 1                                                 | 2                          | 3 |
|                                                                                |                                                                                                                               | Moving or speaking so slowly that other people could have noticed.<br>Or the opposite - being so fidgety or restless that you have been moving around a lot more than usual | 0                        | 1                                                 | 2                          | 3 |
| Thoughts that you would be better off dead, or of hurting yourself in some way | 0                                                                                                                             | 1                                                                                                                                                                           | 2                        | 3                                                 |                            |   |
| <b>C</b>                                                                       | <b>Health risk behavior</b>                                                                                                   |                                                                                                                                                                             |                          |                                                   |                            |   |
| <b>C1</b>                                                                      | <b>In recent times, how often do you drink alcohol?</b>                                                                       |                                                                                                                                                                             |                          |                                                   |                            |   |
|                                                                                | Never                                                                                                                         | 1                                                                                                                                                                           |                          |                                                   |                            |   |
|                                                                                | Monthly                                                                                                                       | 2                                                                                                                                                                           |                          |                                                   |                            |   |
|                                                                                | Weekly                                                                                                                        | 3                                                                                                                                                                           |                          |                                                   |                            |   |
|                                                                                | 2-3 times per week                                                                                                            | 4                                                                                                                                                                           |                          |                                                   |                            |   |
|                                                                                | > = 4 times per week                                                                                                          | 5                                                                                                                                                                           |                          |                                                   |                            |   |
| <b>C2</b>                                                                      | <b>Usually when drinking alcohol, how often do you drink cups?</b>                                                            |                                                                                                                                                                             | .....cups                |                                                   |                            |   |
| <b>C3</b>                                                                      | <b>How often do you drink 6 or more cups of alcohol?</b>                                                                      |                                                                                                                                                                             |                          |                                                   |                            |   |
|                                                                                | Never                                                                                                                         | 1                                                                                                                                                                           |                          |                                                   |                            |   |
|                                                                                | Every few months                                                                                                              | 2                                                                                                                                                                           |                          |                                                   |                            |   |
|                                                                                | Monthly                                                                                                                       | 3                                                                                                                                                                           |                          |                                                   |                            |   |
|                                                                                | Weekly                                                                                                                        | 4                                                                                                                                                                           |                          |                                                   |                            |   |
|                                                                                | Daily                                                                                                                         | 5                                                                                                                                                                           |                          |                                                   |                            |   |
| <b>C4</b>                                                                      | <b>Within the last 30 days, did you smoke cigarettes / pipe tobacco?</b>                                                      |                                                                                                                                                                             |                          |                                                   |                            |   |
|                                                                                | Yes, smoke cigarette                                                                                                          | 1                                                                                                                                                                           |                          |                                                   |                            |   |
|                                                                                | Yes, smoking pipe tobacco                                                                                                     | 2                                                                                                                                                                           |                          |                                                   |                            |   |
|                                                                                | Yes, smoking both types                                                                                                       | 3                                                                                                                                                                           |                          |                                                   |                            |   |
|                                                                                | No                                                                                                                            | 4                                                                                                                                                                           |                          |                                                   |                            |   |
